# Supplementary material
Source: publisher site journal article supplement (https://www.dovepress.com/article/461010)
Supplement: Supplementary file 1 [file get_supplementary_file.php]

**Supplement table of contents**

[Supplement table of contents 1](#_Toc12540)

[Table S1：Sources and basic information of GWAS data and transcriptome data. 3](#_Toc3490)

[Table S2：Osteoarthritis,sleep apnea Mendelian randomization pleiotropic test results. 3](#_Toc27646)

[Table S3：Osteoarthritis and sleep apnea Mendelian randomization heterogeneous results. 3](#_Toc32686)

[Table S4：Osteoarthritis and sleep apnea Mendelian randomization results show. 4](#_Toc21830)

[Table S5:Results of Mendelian randomization analysis of colorectal cancer pathways and osteoarthritis and sleep apnea syndrome. 6](#_Toc2996)

[Table S6：Osteoarthritis,sleep apnea and colorectal cancer pathways Mendelian randomization pleiotropic test results. 7](#_Toc18232)

[Table S7：Osteoarthritis,sleep apnea and colorectal cancer pathways Mendelian randomization heterogeneous results. 7](#_Toc10997)

[Table S8：Results of colocalization analysis of osteoarthritis and sleep apnea syndrome. 7](#_Toc25811)

[Table S9：Immune cell phenotype and sleep apnea Mendelian randomization analysis results. 8](#_Toc20524)

[Table S10：pleiotropy and heterogeneity results of immune cells (exposure) and sleep apnea syndromes (outcome) 10](#_Toc10935)

[Table S11：Immune cell phenotype and osteoarthritis Mendelian randomization analysis results. 13](#_Toc20224)

[Table S12：pleiotropy and heterogeneity results of immune cells (exposure) and Osteoarthritis (outcome) 18](#_Toc26962)

[Table S13 :Results of Mendelian randomization analysis of immune-cell phenotypes contributing to both osteoarthritis and sleep apnea syndrome 22](#_Toc23561)

# Table S1：Sources and basic information of GWAS data and transcriptome data.

| **Disease** | **Data type** | **Population Characteristics** | **Sample size** | **Disease** | **Control** | **Data sources** |
| --- | --- | --- | --- | --- | --- | --- |
| Sleep apnea | GWAS | European | 375657 | 38998 | 336659 | finngen-public-data |
| Hip Osteoarthritis | GWAS | European | 263116 | 22254 | 240862 | finngen-public-data |
| Osteoarthritis | GWAS | European | 263116 | 22254 | 240862 | finngen-public-data |
| Knee Osteoarthritis | GWAS | European | 285550 | 44688 | 240862 | finngen-public-data |
| colorectal cancer | GWAS | European | 293646 | 6509 | 287137 | finngen-public-data |
| immune cell | GWAS | European | / | / | / | GWAS Catalog |
| Osteoarthritis | Expression profiling | Germany | 19 | 10 | 9 | GSE12021（GPL96） |
| Osteoarthritis | Expression profiling | Germany | 20 | 10 | 10 | GSE55235（GPL96） |
| Osteoarthritis | Expression profiling | Germany | 20 | 10 | 10 | GSE55457（GPL96） |
| sleep apnea | Expression profiling | USA | 42 | 34 | 8 | GSE135917（GPL6244） |
| osteoarthritis | Expression profiling | USA | 19 | / | / | GSE32317（GPL570） |
| sleep apnea | Expression profiling | China | 34 | / | / | GSE75097（GPL10904） |

# Table S2：Osteoarthritis,sleep apnea Mendelian randomization pleiotropic test results.

| **Outcome** | **Exposure** | **Egger_intercept** | **SE** | **Pval** |
| --- | --- | --- | --- | --- |
| Sleep apnoea | Osteoarthritis | 0.000256441 | 0.011019665 | 0.981536838 |
| Hip osteoarthritis | 0.004209961 | 0.01345549 | 0.756282603 |
| Knee osteoarthritis | -0.019004356 | 0.010442408 | 0.074882382 |
| Osteoarthritis | Sleep apnoea | -0.01677032 | 0.013558796 | 0.232954219 |
| Hip osteoarthritis | -0.009125668 | 0.020387813 | 0.660090148 |
| Knee osteoarthritis | -0.026810231 | 0.015850085 | 0.108991857 |

Egger_intercept, Egger intercept; SE, standard error of the Egger intercept

# Table S3：Osteoarthritis and sleep apnea Mendelian randomization heterogeneous results.

| **Outcome** | **Exposure** | **Method** | **Q** | **Q_df** | **Q_pval** |
| --- | --- | --- | --- | --- | --- |
| Osteoarthritis | Sleep apnoea | MR Egger | 66.93766236 | 17 | 7.21E-08 |
| Inverse variance weighted | 72.96134445 | 18 | 1.42E-08 |
| Hip osteoarthritis | MR Egger | 57.23870892 | 17 | 2.98E-06 |
| Inverse variance weighted | 57.91328186 | 18 | 4.43E-06 |
| Knee osteoarthritis | MR Egger | 62.12732084 | 17 | 4.66E-07 |
| Inverse variance weighted | 72.58346633 | 18 | 1.64E-08 |
| Sleep apnoea | Osteoarthritis | MR Egger | 176.5569431 | 45 | 1.73E-17 |
| Inverse variance weighted | 176.5590678 | 46 | 3.48E-17 |
| Hip osteoarthritis | MR Egger | 179.6762717 | 34 | 1.01E-21 |
| Inverse variance weighted | 180.1936032 | 35 | 1.90E-21 |
| Knee osteoarthritis | MR Egger | 186.6502895 | 49 | 6.14E-18 |
| Inverse variance weighted | 199.2667513 | 50 | 1.04E-19 |

Q, the Q value of Cochran Q; Q_df, the degrees of freedom of Cochran Q

# Table S4：Osteoarthritis and sleep apnea Mendelian randomization results show.

| **Outcome** | **Exposure** | **Method** | **nSNP** | **Pval** | **OR** | **or_lci95** | **or_uci95** |
| --- | --- | --- | --- | --- | --- | --- | --- |
| Osteoarthritis | Sleep apnoea | MR Egger | 19 | 0.026 | 1.74 | 1.12 | 2.70 |
| Weighted median | 19 | 4.70E-04 | 1.20 | 1.08 | 1.33 |
| Inverse variance weighted | 19 | 4.37E-06 | 1.33 | 1.18 | 1.50 |
| Simple mode | 19 | 0.047 | 1.19 | 1.01 | 1.39 |
| Weighted mode | 19 | 0.042 | 1.19 | 1.02 | 1.39 |
| Knee osteoarthritis | Sleep apnoea | MR Egger | 19 | 0.006 | 2.28 | 1.36 | 3.83 |
| Weighted median | 19 | 5.97E-06 | 1.32 | 1.17 | 1.49 |
| Inverse variance weighted | 19 | 1.25E-07 | 1.48 | 1.28 | 1.72 |
| Simple mode | 19 | 0.009 | 1.33 | 1.10 | 1.60 |
| Weighted mode | 19 | 0.004 | 1.33 | 1.12 | 1.57 |
| Hip osteoarthritis | Sleep apnoea | MR Egger | 19 | 0.209 | 1.56 | 0.80 | 3.03 |
| Weighted median | 19 | 4.56E-05 | 1.41 | 1.19 | 1.66 |
| Inverse variance weighted | 19 | 0.001 | 1.35 | 1.13 | 1.60 |
| Simple mode | 19 | 0.014 | 1.52 | 1.12 | 2.05 |
| Weighted mode | 19 | 0.024 | 1.53 | 1.09 | 2.15 |
| Sleep apnoea | Osteoarthritis | MR Egger | 47 | 0.385 | 1.22 | 0.78 | 1.89 |
| Weighted median | 47 | 1.63E-04 | 1.19 | 1.09 | 1.30 |
| Inverse variance weighted | 47 | 1.95E-04 | 1.22 | 1.10 | 1.36 |
| Simple mode | 47 | 0.003 | 1.39 | 1.13 | 1.70 |
| Weighted mode | 47 | 0.008 | 1.34 | 1.09 | 1.65 |
| Sleep apnoea | Knee osteoarthritis | MR Egger | 51 | 0.015 | 1.57 | 1.11 | 2.22 |
| Weighted median | 51 | 0.084 | 1.07 | 0.99 | 1.15 |
| Inverse variance weighted | 51 | 0.001 | 1.15 | 1.05 | 1.24 |
| Simple mode | 51 | 0.927 | 0.99 | 0.78 | 1.25 |
| Weighted mode | 51 | 0.964 | 1.00 | 0.82 | 1.23 |
| Sleep apnoea | Hip osteoarthritis | MR Egger | 36 | 0.739 | 0.94 | 0.68 | 1.32 |
| Weighted median | 36 | 0.131 | 0.96 | 0.90 | 1.01 |
| Inverse variance weighted | 36 | 0.892 | 0.99 | 0.91 | 1.08 |
| Simple mode | 36 | 0.607 | 0.97 | 0.88 | 1.08 |
| Weighted mode | 36 | 0.516 | 0.97 | 0.89 | 1.06 |

OR, odds ratio; or_lci95, the lower limit of 95% confidence interval of OR value; or_uci95, the upper limit of 95% confidence interval of OR value; nSNP, the number of SNPS

# Table S5:Results of Mendelian randomization analysis of colorectal cancer pathways and osteoarthritis and sleep apnea syndrome.

| **Outcome** | **Exposure** | **Method** | **nSNP** | **Pval** | **OR** | **or_lci95** | **or_uci95** |
| --- | --- | --- | --- | --- | --- | --- | --- |
| Sleep apnoea | Colorectal cancer(pathway) | MR Egger | 13 | 0.577 | 0.96 | 0.85 | 1.09 |
| Weighted median | 13 | 0.485 | 0.98 | 0.94 | 1.03 |
| Inverse variance weighted | 13 | 0.025 | 0.96 | 0.93 | 0.99 |
| Simple mode | 13 | 0.554 | 0.98 | 0.91 | 1.05 |
| Weighted mode | 13 | 0.654 | 0.98 | 0.92 | 1.05 |
| Osteoarthritis | Colorectal cancer(pathway) | MR Egger | 13 | 0.951 | 1.00 | 0.88 | 1.13 |
| Weighted median | 13 | 0.019 | 1.05 | 1.01 | 1.09 |
| Inverse variance weighted | 13 | 0.036 | 1.04 | 1.00 | 1.08 |
| Simple mode | 13 | 0.270 | 1.05 | 0.97 | 1.14 |
| Weighted mode | 13 | 0.137 | 1.06 | 0.99 | 1.13 |
| Knee osteoarthritis | Colorectal cancer(pathway) | MR Egger | 13 | 0.560 | 0.95 | 0.79 | 1.13 |
| Weighted median | 13 | 0.734 | 1.01 | 0.96 | 1.06 |
| Inverse variance weighted | 13 | 0.126 | 1.04 | 0.99 | 1.10 |
| Simple mode | 13 | 0.781 | 0.99 | 0.89 | 1.09 |
| Weighted mode | 13 | 0.826 | 0.99 | 0.90 | 1.09 |
| Hip osteoarthritis | Colorectal cancer(pathway) | MR Egger | 13 | 0.595 | 1.07 | 0.85 | 1.34 |
| Weighted median | 13 | 0.045 | 1.07 | 1.00 | 1.15 |
| Inverse variance weighted | 13 | 0.028 | 1.07 | 1.01 | 1.14 |
| Simple mode | 13 | 0.067 | 1.12 | 1.00 | 1.24 |
| Weighted mode | 13 | 0.055 | 1.11 | 1.01 | 1.22 |

OR, odds ratio; or_lci95, the lower limit of 95% confidence interval of OR value; or_uci95, the upper limit of 95% confidence interval of OR value; nSNP, the number of SNPS

# Table S6：Osteoarthritis,sleep apnea and colorectal cancer pathways Mendelian randomization pleiotropic test results.

| **Exposure** | **Outcome** | **Egger_intercept** | **SE** | **Pval** |
| --- | --- | --- | --- | --- |
| Colorectal Cancer (Pathways) | Hip osteoarthritis | 0.000769333 | 0.017494478 | 0.965711874 |
| Osteoarthritis | 0.006507283 | 0.009768785 | 0.519053643 |
| Knee osteoarthritis | 0.014763621 | 0.013694371 | 0.304072045 |
| Sleep apnoea | -0.000560445 | 0.009384901 | 0.953451546 |

Egger_intercept, Egger intercept; SE, standard error of the Egger intercept

# Table S7：Osteoarthritis,sleep apnea and colorectal cancer pathways Mendelian randomization heterogeneous results.

| **Outcome** | **Exposure** | **Method** | **Q** | **Q_df** | **Q_pval** |
| --- | --- | --- | --- | --- | --- |
| Hip osteoarthritis | Colorectal Cancer (Pathways) | MR Egger | 20.5460498 | 11 | 0.038390904 |
| Inverse variance weighted | 20.54966192 | 12 | 0.057376808 |
| Osteoarthritis | MR Egger | 17.01454726 | 11 | 0.107446017 |
| Inverse variance weighted | 17.70089787 | 12 | 0.125078695 |
| Knee osteoarthritis | MR Egger | 22.78772296 | 11 | 0.01893361 |
| Inverse variance weighted | 25.19546442 | 12 | 0.013923309 |
| Sleep apnoea | MR Egger | 8.621166586 | 11 | 0.656814678 |
| Inverse variance weighted | 8.624732798 | 12 | 0.734604848 |

Q, the Q value of Cochran Q; Q_df, the degrees of freedom of Cochran Q

# Table S8：Results of colocalization analysis of osteoarthritis and sleep apnea syndrome.

| Gene | PP.H0.abf | PP.H1.abf | PP.H2.abf | PP.H3.abf | PP.H4.abf |
| --- | --- | --- | --- | --- | --- |
| JUNB | 0.0019 | 0.000000855 | 0.186 | 0.0000836 | 0.812 |
| COL8A1 | 0.00309 | 0.0000103 | 0.0242 | 0.0000801 | 0.973 |
| FOSB | 0.000856 | 0.000206 | 0.0516 | 0.0124 | 0.935 |
| IER2 | 0.0019 | 0.000000801 | 0.187 | 0.0000783 | 0.811 |

# Table S9：Immune cell phenotype and sleep apnea Mendelian randomization analysis results.

| **outcome** | **exposure** | **method** | **nsnp** | **pval** | **or** | **or_lci95** | **or_uci95** |
| --- | --- | --- | --- | --- | --- | --- | --- |
| SAS | CD4 on CD39+ resting Treg | IVW | 10 | 0.001213356 | 0.93722 | 0.90112 | 0.97476 |
| SAS | SSC-A on plasmacytoid DC | IVW | 21 | 0.000184059 | 0.94807 | 0.92193 | 0.97494 |
| SAS | Naive CD8br %CD8br | IVW | 19 | 0.005403585 | 0.95005 | 0.91637 | 0.98498 |
| SAS | CD45 on granulocyte | IVW | 12 | 0.001904336 | 0.95457 | 0.92697 | 0.98300 |
| SAS | Naive CD8br %T cell | IVW | 18 | 0.034208319 | 0.95677 | 0.91842 | 0.99672 |
| SAS | CD25 on secreting Treg | IVW | 9 | 0.044276311 | 0.95739 | 0.91762 | 0.99889 |
| SAS | CM CD8br %T cell | IVW | 17 | 0.016365108 | 0.96006 | 0.92864 | 0.99255 |
| SAS | Naive DN (CD4-CD8-) %DN | IVW | 19 | 0.030774725 | 0.96191 | 0.92860 | 0.99641 |
| SAS | CD127 on CD28+ DN (CD4-CD8-) | IVW | 20 | 0.00516792 | 0.96353 | 0.93877 | 0.98895 |
| SAS | CD38 on CD20- | IVW | 17 | 0.034645556 | 0.96475 | 0.93316 | 0.99741 |
| SAS | CD45 on CD33br HLA DR+ CD14dim | IVW | 11 | 0.004429741 | 0.96478 | 0.94125 | 0.98890 |
| SAS | Activated & resting Treg AC | IVW | 17 | 0.025132073 | 0.96544 | 0.93617 | 0.99562 |
| SAS | CD28- DN (CD4-CD8-) %DN | IVW | 24 | 0.011579872 | 0.96545 | 0.93946 | 0.99217 |
| SAS | Sw mem %B cell | IVW | 10 | 0.04263625 | 0.96571 | 0.93367 | 0.99884 |
| SAS | CD4/CD8br | IVW | 12 | 0.044896834 | 0.96648 | 0.93480 | 0.99922 |
| SAS | CD4 on CM CD4 + | IVW | 14 | 0.00959092 | 0.96664 | 0.94214 | 0.99178 |
| SAS | T cell %leukocyte | IVW | 16 | 0.027331511 | 0.96692 | 0.93845 | 0.99625 |
| SAS | CD11c on myeloid DC | IVW | 26 | 0.033287369 | 0.96704 | 0.93765 | 0.99735 |
| SAS | CD4 on EM CD4+ | IVW | 18 | 0.00660105 | 0.96750 | 0.94470 | 0.99084 |
| SAS | CD28 on CD4+ | IVW | 19 | 0.010230167 | 0.96766 | 0.94368 | 0.99225 |
| SAS | DP (CD4+CD8+) AC | IVW | 15 | 0.035174374 | 0.96822 | 0.93955 | 0.99776 |
| SAS | Granulocyte %leukocyte | IVW | 21 | 0.032025747 | 0.96883 | 0.94119 | 0.99729 |
| SAS | FSC-A on plasmacytoid DC | IVW | 21 | 0.016602871 | 0.96943 | 0.94511 | 0.99437 |
| SAS | CD19 on sw mem | IVW | 25 | 0.017575483 | 0.97095 | 0.94760 | 0.99487 |
| SAS | EM DN (CD4-CD8-) %T cell | IVW | 20 | 0.038371512 | 0.97170 | 0.94566 | 0.99846 |
| SAS | CD4 on HLA DR+ CD4+ | IVW | 18 | 0.038641197 | 0.97190 | 0.94600 | 0.99851 |
| SAS | CD62L- plasmacytoid DC AC | IVW | 21 | 0.044902757 | 0.97346 | 0.94821 | 0.99939 |
| SAS | Activated Treg %CD4 Treg | IVW | 22 | 0.037820868 | 0.97365 | 0.94941 | 0.99850 |
| SAS | CD28- DN (CD4-CD8-) AC | IVW | 28 | 0.047832872 | 0.97461 | 0.95009 | 0.99976 |
| SAS | CCR7 on naive CD4+ | IVW | 20 | 0.02774491 | 0.97596 | 0.95503 | 0.99734 |
| SAS | CD39+ CD4+ %T cell | IVW | 24 | 0.043157195 | 0.98090 | 0.96274 | 0.99941 |
| SAS | CD45RA+ CD28- CD8br %T cell | IVW | 29 | 0.013367612 | 1.00450 | 1.00093 | 1.00808 |
| SAS | CD33 on CD33br HLA DR+ CD14- | IVW | 20 | 0.026088546 | 1.01204 | 1.00143 | 1.02276 |
| SAS | CD33 on CD33br HLA DR+ | IVW | 21 | 0.01817272 | 1.01275 | 1.00216 | 1.02346 |
| SAS | CD33 on Gr MDSC | IVW | 18 | 0.040045047 | 1.01336 | 1.00060 | 1.02628 |
| SAS | Mo MDSC AC | IVW | 16 | 0.034754846 | 1.02019 | 1.00143 | 1.03929 |
| SAS | CD66b on Gr MDSC | IVW | 20 | 0.019987489 | 1.02100 | 1.00328 | 1.03904 |
| SAS | CD38 on naive-mature B cell | IVW | 21 | 0.0429449 | 1.02335 | 1.00073 | 1.04648 |
| SAS | IgD on IgD+ CD24+ | IVW | 20 | 0.015829229 | 1.02371 | 1.00441 | 1.04338 |
| SAS | NKT %T cell | IVW | 28 | 0.026034405 | 1.02466 | 1.00291 | 1.04689 |
| SAS | CD33br HLA DR+ AC | IVW | 20 | 0.014964674 | 1.02723 | 1.00524 | 1.04971 |
| SAS | CD45RA- CD4+ %CD4+ | IVW | 26 | 0.026611168 | 1.02770 | 1.00317 | 1.05282 |
| SAS | IgD+ CD38br %B cell | IVW | 20 | 0.030596992 | 1.02825 | 1.00261 | 1.05455 |
| SAS | HLA DR on CD14- CD16- | IVW | 16 | 0.027615454 | 1.02843 | 1.00309 | 1.05440 |
| SAS | CD39+ CD8br %T cell | IVW | 18 | 0.028801355 | 1.02872 | 1.00293 | 1.05517 |
| SAS | NKT %lymphocyte | IVW | 28 | 0.015202352 | 1.02897 | 1.00552 | 1.05298 |
| SAS | IgD+ CD38dim %lymphocyte | IVW | 30 | 0.011593508 | 1.03169 | 1.00700 | 1.05699 |
| SAS | CD8 on CD8br | IVW | 21 | 0.008865832 | 1.03207 | 1.00796 | 1.05676 |
| SAS | PDL-1 on CD14+ CD16+ monocyte | IVW | 21 | 0.012601324 | 1.03235 | 1.00685 | 1.05850 |
| SAS | CD80 on plasmacytoid DC | IVW | 15 | 0.025017257 | 1.03266 | 1.00404 | 1.06209 |
| SAS | CD80 on CD62L+ plasmacytoid DC | IVW | 15 | 0.024575985 | 1.03283 | 1.00415 | 1.06233 |
| SAS | CD64 on CD14- CD16- | IVW | 14 | 0.04798801 | 1.03293 | 1.00029 | 1.06664 |
| SAS | CD3- lymphocyte %leukocyte | IVW | 14 | 0.041201664 | 1.03502 | 1.00137 | 1.06979 |
| SAS | CD28+ DN (CD4-CD8-) %DN | IVW | 24 | 0.011579872 | 1.03578 | 1.00789 | 1.06444 |
| SAS | CD24+ CD27+ AC | IVW | 22 | 0.013935233 | 1.03651 | 1.00730 | 1.06656 |
| SAS | CD127 on CD8br | IVW | 21 | 0.005383624 | 1.03851 | 1.01124 | 1.06651 |
| SAS | CD38 on IgD+ CD24- | IVW | 15 | 0.004203826 | 1.04052 | 1.01260 | 1.06921 |

nsnp, number of SNPS; or, odds ratio; or_lci95, the lower limit of 95% confidence interval of OR value; or_uci95, the upper limit of 95% confidence interval of OR value; SAS, Sleep apnea syndrome; IVW, Inverse variance weighted.

# Table S10：pleiotropy and heterogeneity results of immune cells (exposure) and sleep apnea syndromes (outcome)

| **Exposure** | **Q** | **Q_df** | **Q_pval** | **Egger intercept** | **SE** | **Pval** |
| --- | --- | --- | --- | --- | --- | --- |
| CD127 on CD28+ DN (CD4-CD8-) | 17.527 | 19 | 0.554 | -1.24E-02 | 6.01E-03 | 0.054 |
| CD3- lymphocyte %leukocyte | 20.042 | 13 | 0.094 | -1.59E-02 | 9.04E-03 | 0.105 |
| IgD on IgD+ CD24+ | 23.480 | 19 | 0.217 | 8.69E-03 | 5.16E-03 | 0.109 |
| CD11c on myeloid DC | 43.956 | 25 | 0.011 | -1.12E-02 | 7.38E-03 | 0.143 |
| T cell %leukocyte | 14.857 | 15 | 0.462 | 9.70E-03 | 6.72E-03 | 0.171 |
| CD39+ CD4+ %T cell | 28.838 | 23 | 0.186 | -6.47E-03 | 4.71E-03 | 0.184 |
| IgD+ CD38dim %lymphocyte | 31.621 | 29 | 0.337 | 7.71E-03 | 5.67E-03 | 0.184 |
| Naive CD8br %CD8br | 15.343 | 18 | 0.638 | -7.70E-03 | 5.71E-03 | 0.195 |
| CD4 on HLA DR+ CD4+ | 20.139 | 17 | 0.267 | -8.55E-03 | 6.70E-03 | 0.220 |
| CD39+ CD8br %T cell | 26.746 | 17 | 0.062 | 7.94E-03 | 6.75E-03 | 0.257 |
| FSC-A on plasmacytoid DC | 14.224 | 20 | 0.819 | -6.91E-03 | 6.22E-03 | 0.280 |
| NKT %T cell | 35.613 | 27 | 0.124 | 5.40E-03 | 5.16E-03 | 0.304 |
| IgD+ CD38br %B cell | 18.797 | 19 | 0.470 | -7.71E-03 | 7.35E-03 | 0.308 |
| CD38 on IgD+ CD24- | 14.302 | 14 | 0.427 | -5.36E-03 | 5.29E-03 | 0.329 |
| Activated Treg %CD4 Treg | 18.356 | 21 | 0.626 | -5.75E-03 | 5.83E-03 | 0.336 |
| CM CD8br %T cell | 21.726 | 16 | 0.152 | -7.96E-03 | 8.14E-03 | 0.344 |
| CD4 on CM CD4 + | 12.143 | 13 | 0.516 | -7.64E-03 | 8.25E-03 | 0.373 |
| CD4 on CD39+ resting Treg | 8.739 | 9 | 0.462 | -7.67E-03 | 8.27E-03 | 0.380 |
| Granulocyte %leukocyte | 21.307 | 20 | 0.379 | -5.66E-03 | 6.62E-03 | 0.403 |
| SSC-A on plasmacytoid DC | 25.528 | 20 | 0.182 | -7.26E-03 | 8.64E-03 | 0.411 |
| CD28- DN (CD4-CD8-) %DN | 28.294 | 23 | 0.205 | 7.36E-03 | 8.82E-03 | 0.413 |
| CD28+ DN (CD4-CD8-) %DN | 28.294 | 23 | 0.205 | -7.36E-03 | 8.82E-03 | 0.413 |
| NKT %lymphocyte | 32.537 | 27 | 0.213 | 4.35E-03 | 5.24E-03 | 0.414 |
| Naive DN (CD4-CD8-) %DN | 9.709 | 18 | 0.941 | -5.78E-03 | 7.23E-03 | 0.436 |
| CD28 on CD4+ | 26.829 | 18 | 0.082 | -5.66E-03 | 7.11E-03 | 0.437 |
| Naive CD8br %T cell | 26.437 | 17 | 0.067 | -6.40E-03 | 8.09E-03 | 0.440 |
| CD45 on CD33br HLA DR+ CD14dim | 16.627 | 10 | 0.083 | -7.62E-03 | 1.02E-02 | 0.473 |
| CD19 on sw mem | 27.780 | 24 | 0.269 | -4.43E-03 | 6.11E-03 | 0.476 |
| PDL-1 on CD14+ CD16+ monocyte | 19.363 | 20 | 0.498 | -4.77E-03 | 6.63E-03 | 0.481 |
| CD45RA+ CD28- CD8br %T cell | 29.940 | 28 | 0.366 | 3.80E-03 | 5.46E-03 | 0.493 |
| CD25 on secreting Treg | 4.505 | 8 | 0.809 | -9.17E-03 | 1.38E-02 | 0.528 |
| CD33 on CD33br HLA DR+ | 28.476 | 20 | 0.099 | 2.52E-03 | 4.72E-03 | 0.599 |
| CD64 on CD14- CD16- | 14.607 | 13 | 0.333 | 4.85E-03 | 9.40E-03 | 0.615 |
| CD62L- plasmacytoid DC AC | 23.221 | 20 | 0.278 | -3.71E-03 | 7.31E-03 | 0.618 |
| CCR7 on naive CD4+ | 12.634 | 19 | 0.857 | 3.11E-03 | 6.34E-03 | 0.630 |
| CD28- DN (CD4-CD8-) AC | 37.697 | 27 | 0.083 | 3.58E-03 | 8.17E-03 | 0.665 |
| Sw mem %B cell | 5.580 | 9 | 0.781 | -2.92E-03 | 6.69E-03 | 0.675 |
| CD33 on Gr MDSC | 19.160 | 17 | 0.319 | 2.20E-03 | 5.31E-03 | 0.684 |
| CD66b on Gr MDSC | 26.130 | 19 | 0.127 | -2.85E-03 | 7.34E-03 | 0.702 |
| CD45RA- CD4+ %CD4+ | 20.913 | 25 | 0.697 | 2.01E-03 | 5.35E-03 | 0.711 |
| CD8 on CD8br | 24.983 | 20 | 0.202 | -2.33E-03 | 6.42E-03 | 0.721 |
| CD45 on granulocyte | 14.930 | 11 | 0.186 | 3.20E-03 | 8.97E-03 | 0.729 |
| CD4 on EM CD4+ | 19.179 | 17 | 0.318 | -2.50E-03 | 7.54E-03 | 0.744 |
| CD38 on CD20- | 15.631 | 16 | 0.479 | -2.29E-03 | 7.52E-03 | 0.765 |
| CD80 on plasmacytoid DC | 22.432 | 14 | 0.070 | 3.22E-03 | 1.07E-02 | 0.768 |
| CD80 on CD62L+ plasmacytoid DC | 22.401 | 14 | 0.071 | 3.06E-03 | 1.08E-02 | 0.781 |
| Activated & resting Treg AC | 14.175 | 16 | 0.586 | -2.21E-03 | 8.30E-03 | 0.793 |
| EM DN (CD4-CD8-) %T cell | 8.215 | 19 | 0.984 | -1.57E-03 | 6.57E-03 | 0.814 |
| CD4/CD8br | 10.896 | 11 | 0.452 | 1.12E-03 | 8.00E-03 | 0.892 |
| CD24+ CD27+ AC | 32.141 | 21 | 0.057 | -7.17E-04 | 7.21E-03 | 0.922 |
| CD33br HLA DR+ AC | 29.548 | 19 | 0.058 | 8.68E-04 | 9.00E-03 | 0.924 |
| CD127 on CD8br | 29.041 | 20 | 0.087 | -8.29E-04 | 1.02E-02 | 0.936 |
| Mo MDSC AC | 11.334 | 15 | 0.729 | -4.77E-04 | 6.09E-03 | 0.939 |
| HLA DR on CD14- CD16- | 22.532 | 15 | 0.095 | 2.80E-04 | 8.85E-03 | 0.975 |
| DP (CD4+CD8+) AC | 17.429 | 14 | 0.234 | -2.04E-04 | 8.19E-03 | 0.981 |
| CD38 on naive-mature B cell | 23.793 | 20 | 0.252 | -5.96E-05 | 4.97E-03 | 0.991 |
| CD33 on CD33br HLA DR+ CD14- | 23.446 | 19 | 0.218 | 5.64E-05 | 4.80E-03 | 0.991 |

Q, the Q value of Cochran Q obtained by IVW; Q_df, the degree of freedom of Cochran Q obtained by IVW; Egger_intercept, Egger intercept; SE, standard error of the Egger intercept

# Table S11：Immune cell phenotype and osteoarthritis Mendelian randomization analysis results.

| **outcome** | **exposure** | **method** | **nsnp** | **pval** | **or** | **or_lci95** | **or_uci95** |
| --- | --- | --- | --- | --- | --- | --- | --- |
| OA | CD20- AC | IVW | 21 | 1.63325E-05 | 0.93012 | 0.89997 | 0.96127 |
| OA | CD4 on CD39+ resting Treg | IVW | 9 | 0.002353534 | 0.94607 | 0.91287 | 0.98048 |
| OA | IgD on transitional | IVW | 28 | 0.00059974 | 0.95267 | 0.92664 | 0.97942 |
| OA | CD38 on IgD+ | IVW | 13 | 0.021918074 | 0.95817 | 0.92378 | 0.99383 |
| OA | CD28+ CD45RA+ CD8br %CD8br | IVW | 17 | 0.006349189 | 0.95937 | 0.93122 | 0.98838 |
| OA | CD20- %lymphocyte | IVW | 12 | 0.018719964 | 0.95993 | 0.92776 | 0.99322 |
| OA | Activated & secreting Treg AC | IVW | 8 | 0.030668016 | 0.96204 | 0.92886 | 0.99640 |
| OA | HSC AC | IVW | 15 | 0.000701578 | 0.96576 | 0.94650 | 0.98542 |
| OA | SSC-A on HLA DR+ CD8br | IVW | 19 | 0.004300564 | 0.96737 | 0.94558 | 0.98965 |
| OA | CD45 on HLA DR+ T cell | IVW | 14 | 0.049183027 | 0.96737 | 0.93591 | 0.99988 |
| OA | CD4 on CD39+ secreting Treg | IVW | 18 | 0.001181102 | 0.96740 | 0.94822 | 0.98697 |
| OA | CD24 on IgD- CD38dim | IVW | 16 | 0.007562342 | 0.96762 | 0.94453 | 0.99128 |
| OA | CD3 on CD39+ resting Treg | IVW | 15 | 0.003909727 | 0.96762 | 0.94623 | 0.98950 |
| OA | SSC-A on CD14+ monocyte | IVW | 20 | 0.000238175 | 0.96781 | 0.95106 | 0.98485 |
| OA | CD28- CD8br %CD8br | IVW | 19 | 0.010882803 | 0.96834 | 0.94465 | 0.99262 |
| OA | CD62L- HLA DR++ monocyte %monocyte | IVW | 11 | 0.036029099 | 0.96867 | 0.94027 | 0.99793 |
| OA | CD28 on CD45RA+ CD4+ | IVW | 10 | 0.027280362 | 0.96921 | 0.94266 | 0.99650 |
| OA | CD4 on HLA DR+ CD4+ | IVW | 19 | 0.041397691 | 0.96963 | 0.94131 | 0.99880 |
| OA | CD45RA on TD CD8br | IVW | 13 | 0.037237194 | 0.97143 | 0.94529 | 0.99829 |
| OA | CD28+ CD45RA+ CD8br AC | IVW | 24 | 0.049597931 | 0.97147 | 0.94380 | 0.99995 |
| OA | CD3 on NKT | IVW | 14 | 0.028309477 | 0.97185 | 0.94737 | 0.99697 |
| OA | CD45 on CD33dim HLA DR+ CD11b- | IVW | 9 | 0.032375007 | 0.97209 | 0.94721 | 0.99762 |
| OA | Naive-mature B cell %lymphocyte | IVW | 20 | 0.021018133 | 0.97293 | 0.95052 | 0.99587 |
| OA | CD28+ CD45RA- CD8br %CD8br | IVW | 20 | 0.005664694 | 0.97304 | 0.95438 | 0.99206 |
| OA | CD39+ CD8br AC | IVW | 19 | 0.005215419 | 0.97390 | 0.95600 | 0.99214 |
| OA | IgD+ CD38dim %lymphocyte | IVW | 29 | 0.011766493 | 0.97391 | 0.95407 | 0.99415 |
| OA | CD27 on IgD+ CD38- unsw mem | IVW | 21 | 0.00438532 | 0.97484 | 0.95789 | 0.99208 |
| OA | CD8dim %leukocyte | IVW | 16 | 0.044406171 | 0.97484 | 0.95093 | 0.99936 |
| OA | CD14- CD16+ monocyte %monocyte | IVW | 17 | 0.048758192 | 0.97537 | 0.95148 | 0.99986 |
| OA | CD25++ CD8br %CD8br | IVW | 21 | 0.030691091 | 0.97687 | 0.95636 | 0.99783 |
| OA | CD38 on naive-mature B cell | IVW | 21 | 0.020807797 | 0.97825 | 0.96017 | 0.99666 |
| OA | CD4 on naive CD4+ | IVW | 18 | 0.039224839 | 0.97869 | 0.95885 | 0.99894 |
| OA | CD39+ CD8br %T cell | IVW | 18 | 0.046911375 | 0.97871 | 0.95815 | 0.99971 |
| OA | CCR2 on CD62L+ myeloid DC | IVW | 13 | 0.042103759 | 0.97921 | 0.95957 | 0.99925 |
| OA | Unsw mem %B cell | IVW | 26 | 0.02595251 | 0.97925 | 0.96134 | 0.99749 |
| OA | CD38 on transitional | IVW | 22 | 0.030549328 | 0.98029 | 0.96276 | 0.99813 |
| OA | CD27 on CD24+ CD27+ | IVW | 25 | 0.017056688 | 0.98177 | 0.96705 | 0.99672 |
| OA | HVEM on CD4+ | IVW | 15 | 0.032057648 | 0.98275 | 0.96724 | 0.99851 |
| OA | HLA DR on B cell | IVW | 13 | 0.024775751 | 0.98358 | 0.96946 | 0.99790 |
| OA | CD3 on T cell | IVW | 25 | 0.048002569 | 0.98478 | 0.96993 | 0.99987 |
| OA | CD64 on CD14+ CD16+ monocyte | IVW | 23 | 0.049609606 | 0.98510 | 0.97044 | 0.99997 |
| OA | CD27 on sw mem | IVW | 29 | 0.044353549 | 0.98557 | 0.97170 | 0.99963 |
| OA | CD39+ activated Treg %activated Treg | IVW | 22 | 0.038358324 | 0.98940 | 0.97948 | 0.99943 |
| OA | CD45RA+ CD28- CD8br %CD8br | IVW | 14 | 0.000126009 | 1.00348 | 1.00170 | 1.00527 |
| OA | CD33 on CD33dim HLA DR+ CD11b- | IVW | 21 | 0.047189367 | 1.00947 | 1.00012 | 1.01892 |
| OA | CD33 on CD66b++ myeloid cell | IVW | 16 | 0.037458789 | 1.01083 | 1.00062 | 1.02113 |
| OA | CD33 on CD33br HLA DR+ | IVW | 21 | 0.014086976 | 1.01105 | 1.00222 | 1.01996 |
| OA | CD33 on Mo MDSC | IVW | 20 | 0.012592957 | 1.01160 | 1.00248 | 1.02080 |
| OA | CD33 on CD33br HLA DR+ CD14- | IVW | 20 | 0.010026343 | 1.01162 | 1.00276 | 1.02055 |
| OA | CD33 on CD33br HLA DR+ CD14dim | IVW | 24 | 0.004581373 | 1.01185 | 1.00364 | 1.02013 |
| OA | HLA DR on CD33- HLA DR+ | IVW | 11 | 0.046687148 | 1.01348 | 1.00020 | 1.02693 |
| OA | IgD on IgD+ CD38- unsw mem | IVW | 17 | 0.039461734 | 1.01438 | 1.00069 | 1.02825 |
| OA | Basophil AC | IVW | 18 | 0.031298934 | 1.01500 | 1.00134 | 1.02886 |
| OA | IgD on IgD+ CD38dim | IVW | 20 | 0.016457983 | 1.01715 | 1.00311 | 1.03138 |
| OA | CD62L- CD86+ myeloid DC AC | IVW | 14 | 0.047661312 | 1.01757 | 1.00018 | 1.03526 |
| OA | IgD on unsw mem | IVW | 18 | 0.025847261 | 1.01804 | 1.00216 | 1.03418 |
| OA | HLA DR on CD33br HLA DR+ CD14- | IVW | 16 | 0.006171594 | 1.01839 | 1.00519 | 1.03175 |
| OA | Basophil %CD33dim HLA DR- CD66b- | IVW | 18 | 0.005567993 | 1.02078 | 1.00604 | 1.03573 |
| OA | HLA DR on HSC | IVW | 17 | 0.000713802 | 1.02193 | 1.00917 | 1.03485 |
| OA | CD45 on CD33- HLA DR- | IVW | 13 | 0.027716228 | 1.02275 | 1.00247 | 1.04345 |
| OA | CD20 on IgD+ CD24- | IVW | 18 | 0.028280164 | 1.02277 | 1.00240 | 1.04355 |
| OA | CD20 on IgD+ | IVW | 14 | 0.047100578 | 1.02296 | 1.00029 | 1.04613 |
| OA | CD45 on lymphocyte | IVW | 15 | 0.01928563 | 1.02426 | 1.00390 | 1.04504 |
| OA | IgD on IgD+ CD24+ | IVW | 19 | 0.036634204 | 1.02437 | 1.00150 | 1.04776 |
| OA | IgD- CD24- %lymphocyte | IVW | 21 | 0.034832944 | 1.02554 | 1.00180 | 1.04984 |
| OA | Naive-mature B cell %B cell | IVW | 23 | 0.015323415 | 1.02575 | 1.00488 | 1.04705 |
| OA | CD20 on IgD+ CD38br | IVW | 20 | 0.023545386 | 1.02617 | 1.00348 | 1.04937 |
| OA | CD14- CD16- AC | IVW | 18 | 0.033451695 | 1.02651 | 1.00205 | 1.05157 |
| OA | CD19 on IgD+ | IVW | 23 | 0.01873442 | 1.02712 | 1.00446 | 1.05030 |
| OA | CD19 on IgD+ CD38- | IVW | 24 | 0.017854915 | 1.02841 | 1.00484 | 1.05252 |
| OA | CD127- CD8br AC | IVW | 13 | 0.005809551 | 1.02845 | 1.00815 | 1.04915 |
| OA | T/B | IVW | 24 | 0.003342151 | 1.02851 | 1.00938 | 1.04800 |
| OA | CD19 on naive-mature B cell | IVW | 21 | 0.023441168 | 1.02862 | 1.00382 | 1.05403 |
| OA | CD127 on CD28+ CD4+ | IVW | 15 | 0.007751551 | 1.02918 | 1.00762 | 1.05120 |
| OA | Granulocyte AC | IVW | 20 | 0.020730419 | 1.02956 | 1.00445 | 1.05530 |
| OA | CD127 on CD4+ | IVW | 18 | 0.004334694 | 1.03070 | 1.00951 | 1.05233 |
| OA | CD28 on CD28+ DN (CD4-CD8-) | IVW | 18 | 0.003688004 | 1.03082 | 1.00991 | 1.05215 |
| OA | CD19 on IgD+ CD38dim | IVW | 19 | 0.008417556 | 1.03310 | 1.00837 | 1.05843 |
| OA | CD19 on IgD+ CD24- | IVW | 21 | 0.0052739 | 1.03421 | 1.01006 | 1.05895 |
| OA | FSC-A on CD4+ | IVW | 14 | 0.035133766 | 1.03447 | 1.00236 | 1.06761 |
| OA | HLA DR++ monocyte AC | IVW | 14 | 0.012478076 | 1.03473 | 1.00738 | 1.06282 |
| OA | HLA DR+ CD4+ %lymphocyte | IVW | 16 | 0.009060267 | 1.03559 | 1.00875 | 1.06315 |
| OA | CD45 on CD33- HLA DR+ | IVW | 14 | 0.000434592 | 1.03623 | 1.01589 | 1.05699 |
| OA | TD CD4+ %CD4+ | IVW | 13 | 0.031810343 | 1.03626 | 1.00310 | 1.07050 |
| OA | CD25 on IgD+ CD38br | IVW | 10 | 0.00314752 | 1.03820 | 1.01269 | 1.06436 |
| OA | EM CD4+ %CD4+ | IVW | 22 | 0.006811796 | 1.03857 | 1.01049 | 1.06743 |
| OA | CD20 on IgD+ CD38dim | IVW | 21 | 0.000205653 | 1.03904 | 1.01824 | 1.06026 |
| OA | CD45 on CD14+ monocyte | IVW | 13 | 0.006062325 | 1.04009 | 1.01130 | 1.06970 |
| OA | CD20- CD38- AC | IVW | 11 | 0.034211462 | 1.04406 | 1.00321 | 1.08658 |
| OA | CD4+ AC | IVW | 18 | 0.031651148 | 1.04425 | 1.00381 | 1.08632 |
| OA | IgD- CD38- AC | IVW | 9 | 0.022805071 | 1.04630 | 1.00632 | 1.08788 |
| OA | PB/PC %lymphocyte | IVW | 13 | 0.005249712 | 1.04678 | 1.01371 | 1.08094 |
| OA | CD64 on CD14- CD16- | IVW | 13 | 0.000776149 | 1.04833 | 1.01987 | 1.07759 |
| OA | CD127 on CD45RA+ CD4+ | IVW | 18 | 2.52441E-05 | 1.05569 | 1.02940 | 1.08264 |
| OA | CD45RA+ CD8br AC | IVW | 17 | 3.88854E-05 | 1.06310 | 1.03256 | 1.09455 |

nsnp, number of SNPS; or, odds ratio; or_lci95, the lower limit of 95% confidence interval of OR value; or_uci95, the upper limit of 95% confidence interval of OR value; OA, osteoarthritis; IVW, Inverse variance weighted.

# Table S12：pleiotropy and heterogeneity results of immune cells (exposure) and Osteoarthritis (outcome)

| **exposure** | **Q** | **Q_df** | **Q_pval** | **egger_intercept** | **se** | **pval** |
| --- | --- | --- | --- | --- | --- | --- |
| CD25++ CD8br %CD8br | 18.694 | 20 | 0.542 | -8.60E-03 | 4.13E-03 | 0.051 |
| CD3 on T cell | 32.915 | 24 | 0.106 | -8.10E-03 | 4.27E-03 | 0.070 |
| IgD- CD24- %lymphocyte | 22.702 | 20 | 0.304 | 8.74E-03 | 4.92E-03 | 0.091 |
| CD39+ CD8br %T cell | 24.108 | 17 | 0.117 | 9.10E-03 | 5.10E-03 | 0.093 |
| CD45RA+ CD28- CD8br %CD8br | 16.576 | 13 | 0.219 | -1.13E-02 | 6.18E-03 | 0.094 |
| CD14- CD16- AC | 25.225 | 17 | 0.090 | -1.01E-02 | 5.95E-03 | 0.108 |
| CD19 on IgD+ CD38- | 26.076 | 23 | 0.297 | 8.84E-03 | 5.48E-03 | 0.121 |
| Basophil %CD33dim HLA DR- CD66b- | 22.375 | 17 | 0.171 | 7.51E-03 | 4.72E-03 | 0.131 |
| CD45 on CD33- HLA DR+ | 15.792 | 13 | 0.261 | 1.15E-02 | 7.44E-03 | 0.148 |
| CD62L- HLA DR++ monocyte %monocyte | 9.776 | 10 | 0.460 | -1.13E-02 | 7.34E-03 | 0.158 |
| Basophil AC | 21.326 | 17 | 0.212 | 6.47E-03 | 4.41E-03 | 0.162 |
| HLA DR++ monocyte AC | 18.181 | 13 | 0.151 | -1.26E-02 | 8.86E-03 | 0.179 |
| CD20 on IgD+ CD24- | 27.491 | 17 | 0.051 | -8.70E-03 | 6.21E-03 | 0.181 |
| CD14- CD16+ monocyte %monocyte | 24.025 | 16 | 0.089 | -7.06E-03 | 5.27E-03 | 0.200 |
| CD25 on IgD+ CD38br | 15.926 | 9 | 0.068 | 1.08E-02 | 7.91E-03 | 0.210 |
| CD3 on NKT | 14.658 | 13 | 0.329 | 7.33E-03 | 5.73E-03 | 0.224 |
| CD24 on IgD- CD38dim | 11.632 | 15 | 0.707 | -6.15E-03 | 4.85E-03 | 0.225 |
| CD4 on HLA DR+ CD4+ | 35.634 | 18 | 0.008 | -8.58E-03 | 6.91E-03 | 0.231 |
| CD39+ CD8br AC | 22.901 | 18 | 0.194 | 6.20E-03 | 5.03E-03 | 0.234 |
| CD19 on IgD+ CD24- | 19.447 | 20 | 0.493 | -6.80E-03 | 5.59E-03 | 0.239 |
| CD127- CD8br AC | 14.768 | 12 | 0.254 | 5.36E-03 | 4.50E-03 | 0.258 |
| CD127 on CD4+ | 20.333 | 17 | 0.258 | -7.27E-03 | 6.26E-03 | 0.262 |
| HLA DR on B cell | 16.370 | 12 | 0.175 | 5.50E-03 | 4.75E-03 | 0.271 |
| SSC-A on CD14+ monocyte | 24.235 | 19 | 0.187 | 4.52E-03 | 4.01E-03 | 0.274 |
| CD20 on IgD+ CD38dim | 23.268 | 20 | 0.276 | -7.98E-03 | 7.23E-03 | 0.283 |
| CD45 on CD14+ monocyte | 7.506 | 12 | 0.822 | -6.34E-03 | 5.66E-03 | 0.286 |
| HLA DR+ CD4+ %lymphocyte | 22.315 | 15 | 0.100 | 6.97E-03 | 6.32E-03 | 0.289 |
| CD4 on CD39+ resting Treg | 12.963 | 8 | 0.113 | 1.03E-02 | 9.00E-03 | 0.292 |
| CD39+ activated Treg %activated Treg | 17.863 | 21 | 0.658 | 4.08E-03 | 3.78E-03 | 0.293 |
| CD33 on CD33br HLA DR+ CD14dim | 13.286 | 23 | 0.946 | 3.06E-03 | 2.98E-03 | 0.315 |
| CD20- CD38- AC | 12.318 | 10 | 0.264 | -1.36E-02 | 1.30E-02 | 0.322 |
| CD27 on sw mem | 37.748 | 28 | 0.103 | 5.00E-03 | 4.96E-03 | 0.322 |
| CD19 on naive-mature B cell | 25.143 | 20 | 0.196 | -7.75E-03 | 7.66E-03 | 0.324 |
| CCR2 on CD62L+ myeloid DC | 20.125 | 12 | 0.065 | 7.53E-03 | 7.34E-03 | 0.327 |
| Activated & secreting Treg AC | 7.124 | 7 | 0.416 | 1.23E-02 | 1.20E-02 | 0.344 |
| PB/PC %lymphocyte | 10.329 | 12 | 0.587 | -7.97E-03 | 8.13E-03 | 0.348 |
| CD127 on CD45RA+ CD4+ | 28.424 | 17 | 0.040 | -7.32E-03 | 7.65E-03 | 0.353 |
| Granulocyte AC | 17.493 | 19 | 0.556 | 4.92E-03 | 5.16E-03 | 0.354 |
| CD62L- CD86+ myeloid DC AC | 13.897 | 13 | 0.381 | 4.57E-03 | 4.73E-03 | 0.354 |
| CD4 on naive CD4+ | 19.956 | 17 | 0.276 | -5.26E-03 | 6.11E-03 | 0.402 |
| CD28+ CD45RA+ CD8br %CD8br | 25.341 | 16 | 0.064 | -4.81E-03 | 5.71E-03 | 0.413 |
| IgD on IgD+ CD38dim | 22.871 | 19 | 0.243 | -3.66E-03 | 4.43E-03 | 0.419 |
| CD28 on CD45RA+ CD4+ | 10.335 | 9 | 0.324 | 6.86E-03 | 8.06E-03 | 0.420 |
| CD28+ CD45RA+ CD8br AC | 24.343 | 23 | 0.385 | 4.59E-03 | 5.94E-03 | 0.448 |
| IgD on unsw mem | 21.619 | 17 | 0.200 | -3.50E-03 | 4.63E-03 | 0.460 |
| CD127 on CD28+ CD4+ | 22.384 | 14 | 0.071 | 5.17E-03 | 6.89E-03 | 0.466 |
| CD20 on IgD+ | 19.554 | 13 | 0.107 | -5.78E-03 | 7.82E-03 | 0.474 |
| CD33 on CD33br HLA DR+ CD14- | 23.387 | 19 | 0.221 | 2.82E-03 | 3.94E-03 | 0.484 |
| CD33 on CD33br HLA DR+ | 20.422 | 20 | 0.432 | 2.31E-03 | 3.32E-03 | 0.495 |
| CD45 on HLA DR+ T cell | 24.278 | 13 | 0.029 | -7.63E-03 | 1.09E-02 | 0.496 |
| IgD on IgD+ CD24+ | 34.952 | 18 | 0.010 | -3.99E-03 | 5.89E-03 | 0.507 |
| T/B | 32.684 | 23 | 0.087 | 3.07E-03 | 4.67E-03 | 0.518 |
| Naive-mature B cell %lymphocyte | 14.762 | 19 | 0.738 | 3.70E-03 | 5.73E-03 | 0.527 |
| CD20 on IgD+ CD38br | 20.808 | 19 | 0.348 | -4.37E-03 | 6.90E-03 | 0.534 |
| CD27 on CD24+ CD27+ | 29.716 | 24 | 0.194 | 3.60E-03 | 5.70E-03 | 0.534 |
| EM CD4+ %CD4+ | 29.394 | 21 | 0.105 | 4.92E-03 | 8.07E-03 | 0.549 |
| CD64 on CD14- CD16- | 18.256 | 12 | 0.108 | 5.62E-03 | 9.16E-03 | 0.552 |
| CD33 on CD66b++ myeloid cell | 7.473 | 15 | 0.943 | 2.65E-03 | 4.52E-03 | 0.567 |
| HLA DR on CD33- HLA DR+ | 11.784 | 10 | 0.300 | -2.86E-03 | 4.82E-03 | 0.568 |
| CD4+ AC | 38.131 | 17 | 0.002 | 6.76E-03 | 1.17E-02 | 0.571 |
| HVEM on CD4+ | 19.009 | 14 | 0.165 | 5.11E-03 | 8.98E-03 | 0.579 |
| IgD on IgD+ CD38- unsw mem | 20.794 | 16 | 0.187 | -3.03E-03 | 5.44E-03 | 0.586 |
| CD45RA+ CD8br AC | 20.169 | 16 | 0.213 | 4.59E-03 | 8.29E-03 | 0.588 |
| CD4 on CD39+ secreting Treg | 10.489 | 17 | 0.882 | -3.02E-03 | 5.51E-03 | 0.591 |
| CD28+ CD45RA- CD8br %CD8br | 26.077 | 19 | 0.128 | -2.42E-03 | 4.44E-03 | 0.592 |
| IgD+ CD38dim %lymphocyte | 32.339 | 28 | 0.261 | 2.74E-03 | 5.10E-03 | 0.595 |
| HLA DR on HSC | 25.121 | 16 | 0.068 | -3.12E-03 | 6.31E-03 | 0.628 |
| FSC-A on CD4+ | 4.064 | 13 | 0.990 | 3.77E-03 | 8.33E-03 | 0.658 |
| Naive-mature B cell %B cell | 27.117 | 22 | 0.207 | -2.26E-03 | 5.09E-03 | 0.662 |
| CD19 on IgD+ CD38dim | 23.102 | 18 | 0.187 | -2.94E-03 | 6.64E-03 | 0.663 |
| CD38 on IgD+ | 12.374 | 12 | 0.416 | -3.12E-03 | 7.02E-03 | 0.665 |
| CD27 on IgD+ CD38- unsw mem | 33.359 | 20 | 0.031 | 2.59E-03 | 7.35E-03 | 0.728 |
| CD28 on CD28+ DN (CD4-CD8-) | 19.813 | 17 | 0.284 | 1.60E-03 | 4.99E-03 | 0.753 |
| CD33 on Mo MDSC | 16.038 | 19 | 0.655 | 8.82E-04 | 2.78E-03 | 0.754 |
| IgD on transitional | 51.131 | 27 | 0.003 | -1.97E-03 | 6.30E-03 | 0.757 |
| CD45 on CD33dim HLA DR+ CD11b- | 11.835 | 8 | 0.159 | 3.46E-03 | 1.09E-02 | 0.761 |
| CD3 on CD39+ resting Treg | 12.940 | 14 | 0.531 | 1.86E-03 | 6.82E-03 | 0.790 |
| CD20- %lymphocyte | 18.244 | 11 | 0.076 | 2.61E-03 | 9.73E-03 | 0.794 |
| CD45 on CD33- HLA DR- | 16.775 | 12 | 0.158 | 2.15E-03 | 8.25E-03 | 0.799 |
| CD8dim %leukocyte | 15.935 | 15 | 0.386 | -1.68E-03 | 6.72E-03 | 0.806 |
| CD38 on naive-mature B cell | 26.936 | 20 | 0.137 | -1.06E-03 | 4.40E-03 | 0.812 |
| TD CD4+ %CD4+ | 19.434 | 12 | 0.079 | 2.40E-03 | 9.95E-03 | 0.814 |
| CD28- CD8br %CD8br | 16.739 | 18 | 0.541 | 1.07E-03 | 4.74E-03 | 0.823 |
| HLA DR on CD33br HLA DR+ CD14- | 19.776 | 15 | 0.181 | -1.56E-03 | 6.93E-03 | 0.825 |
| SSC-A on HLA DR+ CD8br | 28.779 | 18 | 0.051 | 1.15E-03 | 5.91E-03 | 0.847 |
| Unsw mem %B cell | 29.820 | 25 | 0.231 | 7.92E-04 | 4.12E-03 | 0.849 |
| CD19 on IgD+ | 24.738 | 22 | 0.310 | 9.71E-04 | 5.35E-03 | 0.858 |
| CD45 on lymphocyte | 20.563 | 14 | 0.113 | 1.22E-03 | 8.58E-03 | 0.889 |
| CD38 on transitional | 24.266 | 21 | 0.280 | -5.33E-04 | 4.50E-03 | 0.907 |
| CD45RA on TD CD8br | 9.405 | 12 | 0.668 | -8.69E-04 | 7.41E-03 | 0.909 |
| IgD- CD38- AC | 13.072 | 8 | 0.109 | 1.10E-03 | 1.20E-02 | 0.929 |
| CD20- AC | 32.366 | 20 | 0.040 | -5.75E-04 | 7.76E-03 | 0.942 |
| CD64 on CD14+ CD16+ monocyte | 27.791 | 22 | 0.183 | -2.73E-04 | 4.68E-03 | 0.954 |
| HSC AC | 16.651 | 14 | 0.275 | 1.51E-04 | 5.64E-03 | 0.979 |
| CD33 on CD33dim HLA DR+ CD11b- | 22.892 | 20 | 0.294 | -6.72E-05 | 3.67E-03 | 0.986 |

Q, the Q value of Cochran Q obtained by IVW; Q_df, the degree of freedom of Cochran Q obtained by IVW; Egger_intercept, Egger intercept; SE, standard error of the Egger intercept

# Table S13 :Results of Mendelian randomization analysis of immune-cell phenotypes contributing to both osteoarthritis and sleep apnea syndrome

| **outcome** | **exposure** | **method** | **nsnp** | **pval** | **or** | **or_lci95** | **or_uci95** |
| --- | --- | --- | --- | --- | --- | --- | --- |
| Osteoarthritis | IgD on IgD+ CD24+ | MR Egger | 19 | 0.106 | 1.0366 | 0.9947 | 1.0803 |
| Weighted median | 19 | 0.014 | 1.0273 | 1.0054 | 1.0497 |
| Inverse variance weighted | 19 | 0.037 | 1.0244 | 1.0015 | 1.0478 |
| Weighted mode | 19 | 0.019 | 1.0273 | 1.0064 | 1.0487 |
| Simple mode | 19 | 0.208 | 1.0307 | 0.9850 | 1.0786 |
| CD33 on CD33br HLA DR+ | MR Egger | 21 | 0.330 | 1.0072 | 0.9931 | 1.0214 |
| Weighted median | 21 | 0.068 | 1.0095 | 0.9993 | 1.0199 |
| Inverse variance weighted | 21 | 0.014 | 1.0110 | 1.0022 | 1.0200 |
| Weighted mode | 21 | 0.055 | 1.0106 | 1.0004 | 1.0210 |
| Simple mode | 21 | 0.204 | 1.0170 | 0.9918 | 1.0428 |
| CD33 on CD33br HLA DR+ CD14- | MR Egger | 20 | 0.390 | 1.0071 | 0.9914 | 1.0231 |
| Weighted median | 20 | 0.079 | 1.0095 | 0.9989 | 1.0202 |
| Inverse variance weighted | 20 | 0.010 | 1.0116 | 1.0028 | 1.0206 |
| Weighted mode | 20 | 0.070 | 1.0102 | 0.9998 | 1.0207 |
| Simple mode | 20 | 0.199 | 1.0179 | 0.9916 | 1.0449 |
| CD4 on HLA DR+ CD4+ | MR Egger | 19 | 0.878 | 1.0051 | 0.9430 | 1.0712 |
| Weighted median | 19 | 0.092 | 0.9733 | 0.9432 | 1.0044 |
| Inverse variance weighted | 19 | 0.041 | 0.9696 | 0.9413 | 0.9988 |
| Weighted mode | 19 | 0.151 | 0.9666 | 0.9246 | 1.0105 |
| Simple mode | 19 | 0.174 | 0.9627 | 0.9134 | 1.0147 |
| CD64 on CD14- CD16- | MR Egger | 13 | 0.711 | 1.0190 | 0.9248 | 1.1229 |
| Weighted median | 13 | 0.023 | 1.0525 | 1.0072 | 1.0998 |
| Inverse variance weighted | 13 | 0.001 | 1.0483 | 1.0199 | 1.0776 |
| Weighted mode | 13 | 0.072 | 1.0549 | 1.0003 | 1.1126 |
| Simple mode | 13 | 0.368 | 1.0357 | 0.9624 | 1.1145 |
| CD4 on CD39+ resting Treg | MR Egger | 9 | 0.067 | 0.9024 | 0.8225 | 0.9901 |
| Weighted median | 9 | 0.211 | 0.9636 | 0.9092 | 1.0212 |
| Inverse variance weighted | 9 | 0.002 | 0.9461 | 0.9129 | 0.9805 |
| Weighted mode | 9 | 0.277 | 0.9544 | 0.8824 | 1.0323 |
| Simple mode | 9 | 0.132 | 0.9202 | 0.8349 | 1.0141 |
| sleep apnea | IgD on IgD+ CD24+ | MR Egger | 20 | 0.873 | 0.9970 | 0.9609 | 1.0344 |
| Weighted median | 20 | 0.409 | 1.0104 | 0.9859 | 1.0354 |
| Inverse variance weighted | 20 | 0.016 | 1.0237 | 1.0044 | 1.0434 |
| Weighted mode | 20 | 0.532 | 1.0080 | 0.9836 | 1.0329 |
| Simple mode | 20 | 0.105 | 1.0535 | 0.9921 | 1.1187 |
| CD33 on CD33br HLA DR+ | MR Egger | 21 | 0.415 | 1.0085 | 0.9886 | 1.0289 |
| Weighted median | 21 | 0.037 | 1.0132 | 1.0008 | 1.0257 |
| Inverse variance weighted | 21 | 0.018 | 1.0128 | 1.0022 | 1.0235 |
| Weighted mode | 21 | 0.053 | 1.0130 | 1.0006 | 1.0255 |
| Simple mode | 21 | 0.805 | 0.9949 | 0.9558 | 1.0356 |
| CD33 on CD33br HLA DR+ CD14- | MR Egger | 20 | 0.240 | 1.0119 | 0.9927 | 1.0315 |
| Weighted median | 20 | 0.042 | 1.0132 | 1.0005 | 1.0261 |
| Inverse variance weighted | 20 | 0.026 | 1.0120 | 1.0014 | 1.0228 |
| Weighted mode | 20 | 0.058 | 1.0133 | 1.0004 | 1.0263 |
| Simple mode | 20 | 0.992 | 0.9998 | 0.9645 | 1.0364 |
| CD4 on HLA DR+ CD4+ | MR Egger | 18 | 0.781 | 1.0094 | 0.9459 | 1.0771 |
| Weighted median | 18 | 0.679 | 0.9922 | 0.9562 | 1.0296 |
| Inverse variance weighted | 18 | 0.039 | 0.9719 | 0.9460 | 0.9985 |
| Weighted mode | 18 | 0.756 | 0.9923 | 0.9461 | 1.0408 |
| Simple mode | 18 | 1.000 | 1.0000 | 0.9470 | 1.0559 |
| CD64 on CD14- CD16- | MR Egger | 14 | 0.874 | 1.0082 | 0.9135 | 1.1126 |
| Weighted median | 14 | 0.291 | 1.0252 | 0.9789 | 1.0736 |
| Inverse variance weighted | 14 | 0.048 | 1.0329 | 1.0003 | 1.0666 |
| Weighted mode | 14 | 0.395 | 1.0236 | 0.9718 | 1.0782 |
| Simple mode | 14 | 0.513 | 1.0220 | 0.9592 | 1.0889 |
| CD4 on CD39+ resting Treg | MR Egger | 10 | 0.459 | 0.9687 | 0.8942 | 1.0494 |
| Weighted median | 10 | 0.010 | 0.9302 | 0.8803 | 0.9830 |
| Inverse variance weighted | 10 | 0.001 | 0.9372 | 0.9011 | 0.9748 |
| Weighted mode | 10 | 0.093 | 0.9254 | 0.8534 | 1.0033 |
| Simple mode | 10 | 0.201 | 0.9380 | 0.8564 | 1.0272 |

or, odds ratio; or_lci95, the lower limit of 95% confidence interval of or value; or_uci95, the upper limit of 95% confidence interval of or value; nSNP, the number of SNPS
